# Supplementary material for: Older Parents’ Cynical Hostility and Their Relationships with Their Adult Children: A Longitudinal Dyadic Study of North American Couples
Source: MDPI journal article supplement (doi:10.3390/healthcare11050736), 2023-03-02
Supplement: s1 [file s1]

## Appendix S1

Table S1: Dyadic analysis of husband and wife contact with their children via meetings, phone calls, and writing

|                                  | Husband's contact<br>via meetings |           | Wife's contact via<br>meetings |           | Husband's contact<br>via phone calls |           | Wife's contact via<br>phone calls |           | Husband's contact<br>via writing |           | Wife's contact via<br>writing |           |
|----------------------------------|-----------------------------------|-----------|--------------------------------|-----------|--------------------------------------|-----------|-----------------------------------|-----------|----------------------------------|-----------|-------------------------------|-----------|
|                                  | <i>b</i>                          | <i>se</i> | <i>b</i>                       | <i>se</i> | <i>b</i>                             | <i>se</i> | <i>b</i>                          | <i>se</i> | <i>b</i>                         | <i>se</i> | <i>b</i>                      | <i>se</i> |
| Respondent's age                 | 0.02                              | 0.03      | 0.04                           | 0.03      | -0.01                                | 0.03      | 0.01                              | 0.03      | -0.08***                         | 0.03      | -0.15***                      | 0.03      |
| Number of<br>children            | -0.06*                            | 0.03      | 0.03                           | 0.03      | -0.06*                               | 0.03      | -0.01                             | 0.03      | -0.05                            | 0.03      | -0.02                         | 0.03      |
| Co-residency <sup>1</sup>        | 0.001                             | 0.03      | 0.06                           | 0.03      | 0.001                                | 0.03      | 0.07*                             | 0.03      | -0.04                            | 0.03      | 0.01                          | 0.03      |
| T1 dependent<br>var <sup>2</sup> | 0.53***                           | 0.02      | 0.51***                        | 0.02      | 0.50***                              | 0.02      | 0.53***                           | 0.02      | 0.62***                          | 0.02      | 0.61***                       | 0.03      |
| Husband's<br>hostility           | -0.07*                            | 0.03      | -0.05                          | 0.03      | -0.01                                | 0.03      | -0.001                            | 0.03      | -0.05+                           | 0.03      | -0.08***                      | 0.03      |
| Wife's hostility                 | -0.01                             | 0.03      | 0.03                           | 0.03      | 0.01                                 | 0.03      | 0.06*                             | 0.03      | -0.04                            | 0.03      | -0.06*                        | 0.03      |

+  $p < .10$ ; \* $p < .05$ ; \*\*\* $p < .001$ 

1. 1=Children co-residing; 0=no co-residing children.
2. Each dependent variable was regressed on the same variable at T1.
